# Supplementary material for: Multi-functional molecular rotators with dielectric, magnetic and optical responses
Source: Royal Society of Chemistry journal article supplement (doi:10.1039/c3ra44515a), 2013-10-28
Supplement: c3ra44515a.pdf [file c3ra44515a.pdf]

## Supporting Information

# Multi-Functional Molecular Rotators with Dielectric, Magnetic and Optical Responses

Norihisa Hoshino,\* Takashi Takeda, and Tomoyuki Akutagawa\*

**Table S1.** Transition temperatures from ordered phase to disordered phase in the heating process of adamantane derivatives.

|          |                                 | $T_{\text{trs}}$ | Molecular weight | Ref. |
|----------|---------------------------------|------------------|------------------|------|
|          | adamantane                      | 178              | 136.2            | [1]  |
| <b>1</b> | 2-azaadamantane- <i>N</i> -oxyl | 300              | 152.2            | [2]  |
| <b>2</b> | 1-methyladamantane              | 212              | 150.3            | [3]  |
| <b>3</b> | 2-adamantanone                  | 205              | 150.2            | [4]  |
| <b>4</b> | 1-chloroadamantane              | 243              | 170.7            | [2]  |
| <b>5</b> | 1-bromoadamantane               | 311              | 215.1            | [2]  |
| <b>6</b> | 2-chloroadamantane              | 237              | 170.7            | [5]  |
| <b>7</b> | 2-bromoadamantane               | 277              | 215.1            | [5]  |
| <b>8</b> | 1-hydroxyadamantane             | 357              | 152.2            | [6]  |
| <b>9</b> | 2-hydroxyadamantane             | 389              | 151.2            | [6]  |

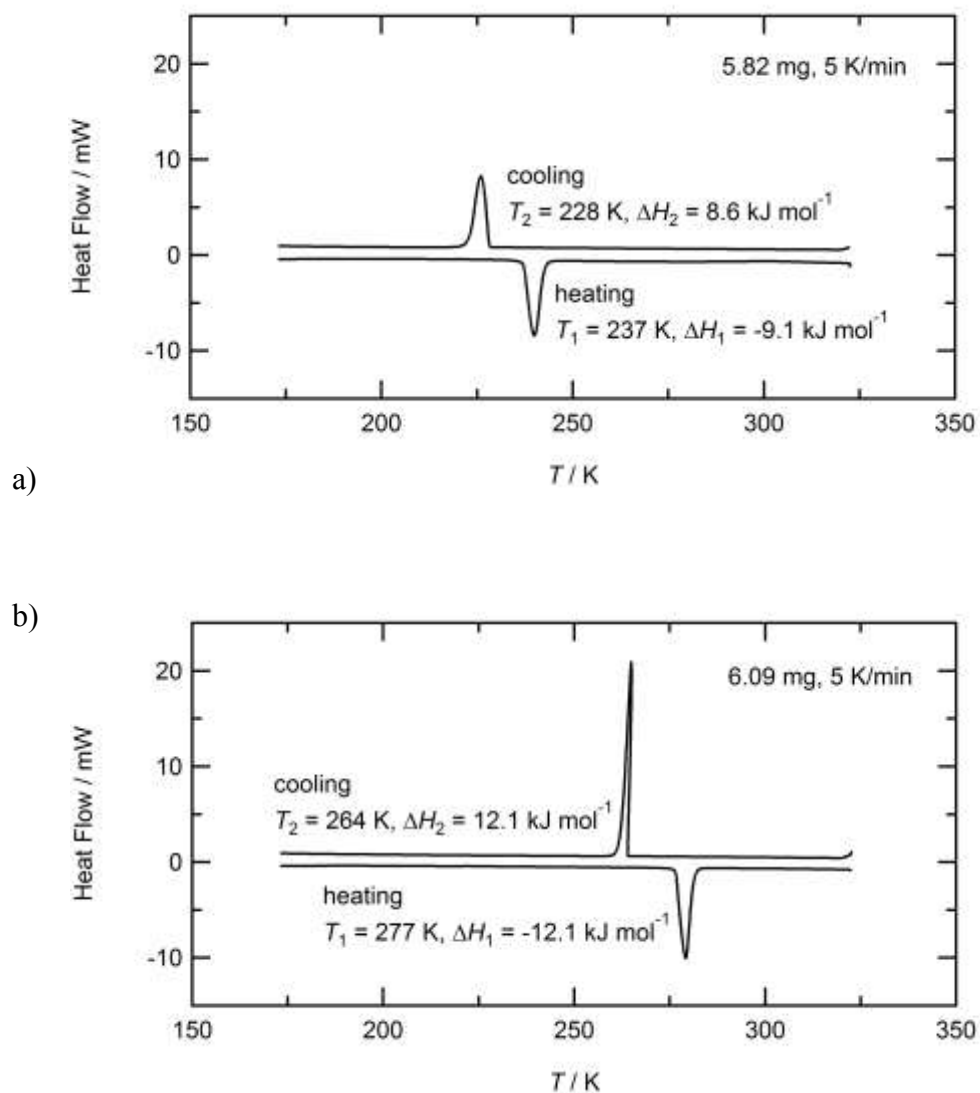

**Figure S1.** Difference scanning thermoanalyses of a) 2-chloroadamantane (**6**) and b) 2-bromoadamantane (**7**). The data were conducted using a Rigaku Thermo plus TG8120 differential scanning calorimeter at the rate of  $5 \text{ K min}^{-1}$ . The samples were used as received without further purification (Wako Chemical for **6** and TCI Chemical for **7**).

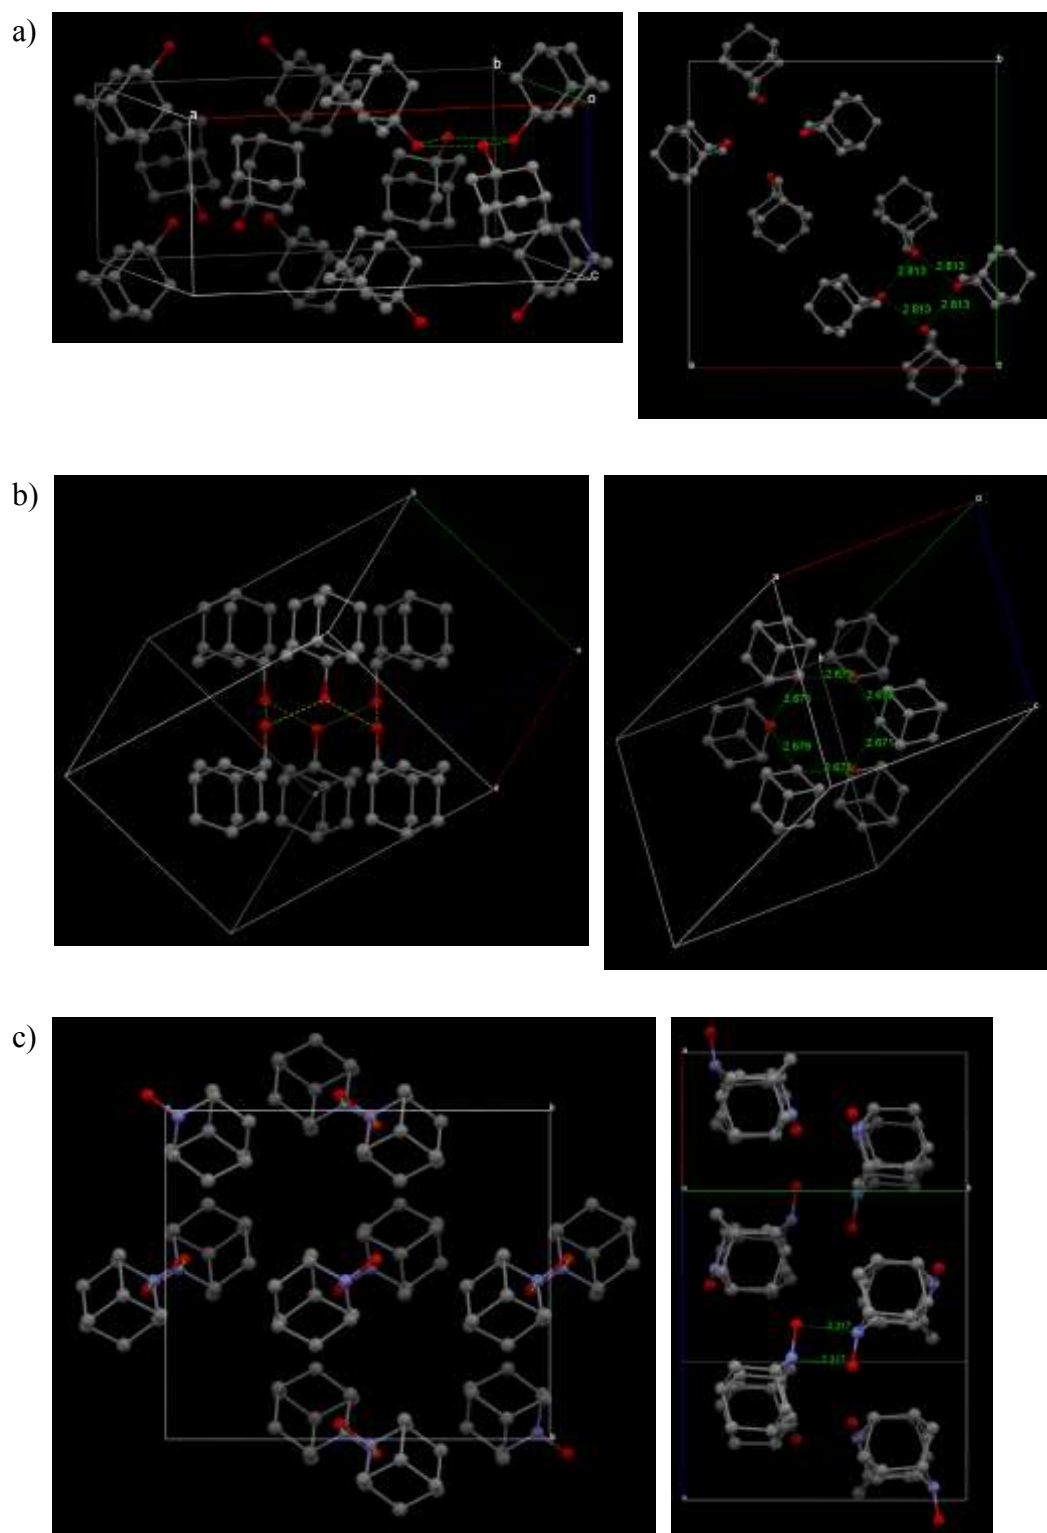

**Figure S2.** Hydrogen bonding structures of a) 1-hydroxyadamantane thermoanalyses of 1-hydroxyadamantane (**8**), b) 2-hydroxyadamantane (**9**) and c) 2-azaadamantane-*N*-oxyl (**1**). Atomic coordinates of **8** and **9** were obtained from ref. [7] and [8].

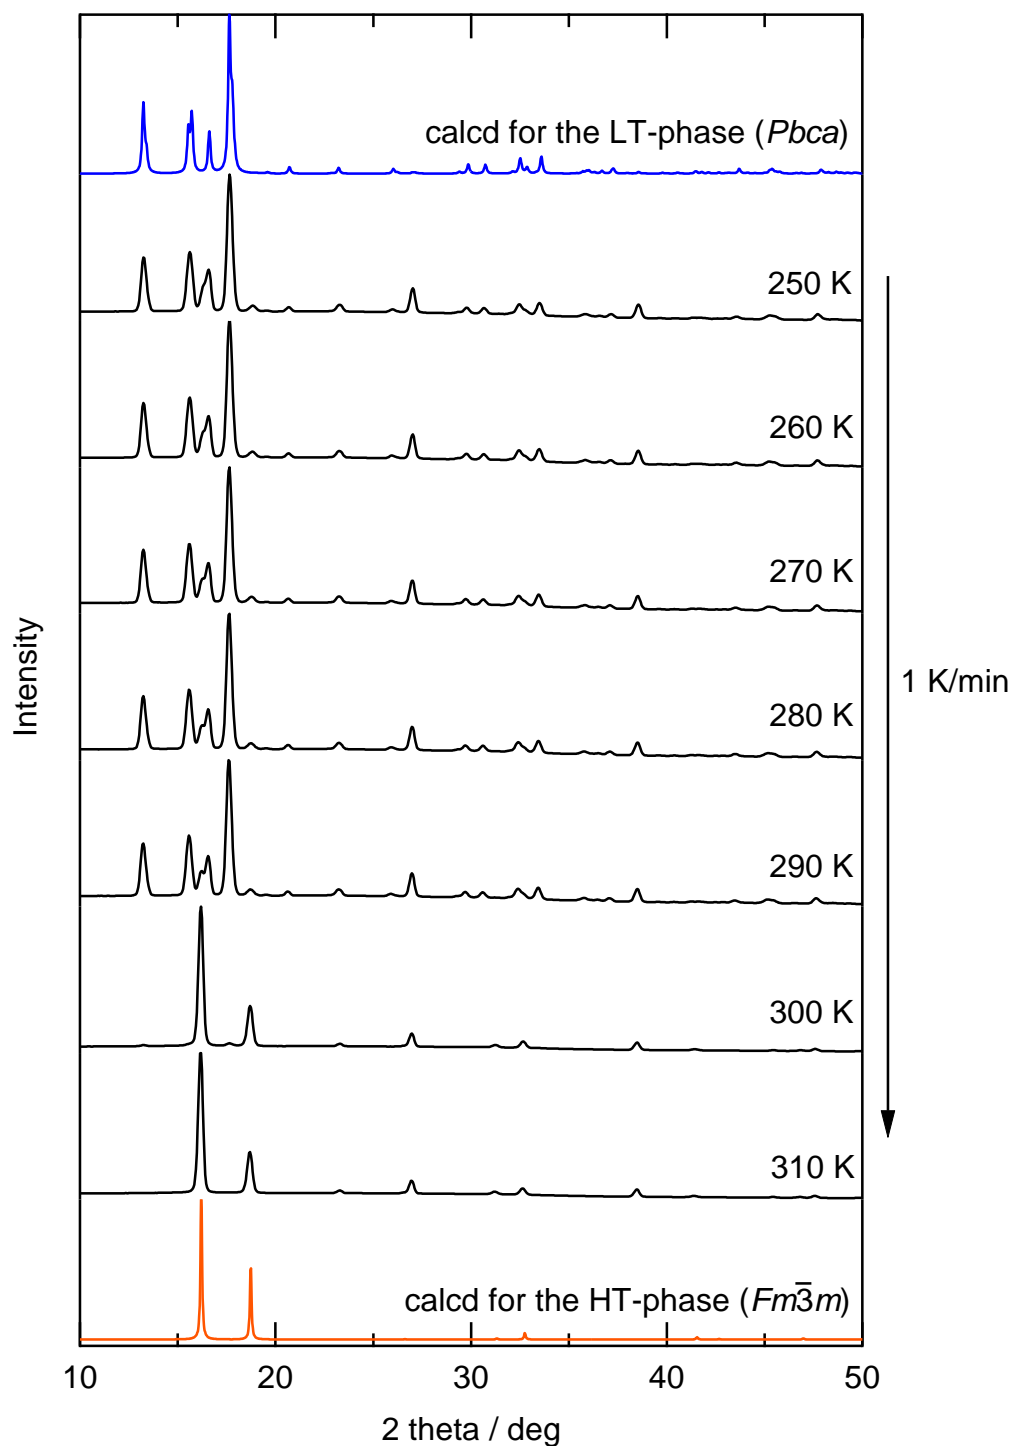

**Figure S3.** Powder X-ray diffractions of **1** in the heating process at the rate of 1 K min<sup>-1</sup>. The powder sample was sealed in a Lindemann glass capillary ( $\varphi = 0.2$  mm) and Debye-Scherrer rings were recorded using Rigaku RAPID-II imaging plate area detector with a Cu-K $\alpha$  radiation.

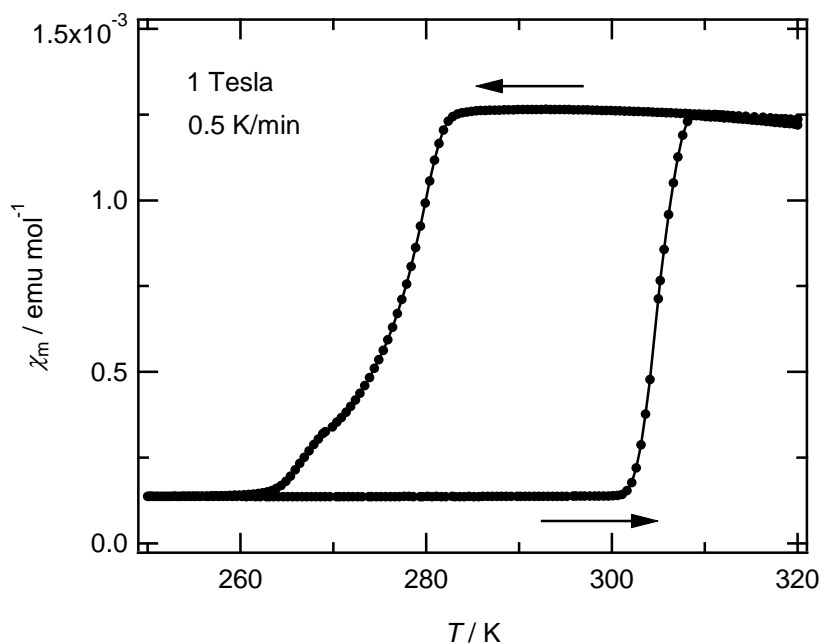

**Figure S4.** Temperature dependent magnetic susceptibilities of **1**. The data were conducted using a MPMS-XL7 magnetometer in the range of 250 ~ 320 K at the rate of  $0.5 \text{ K min}^{-1}$ .

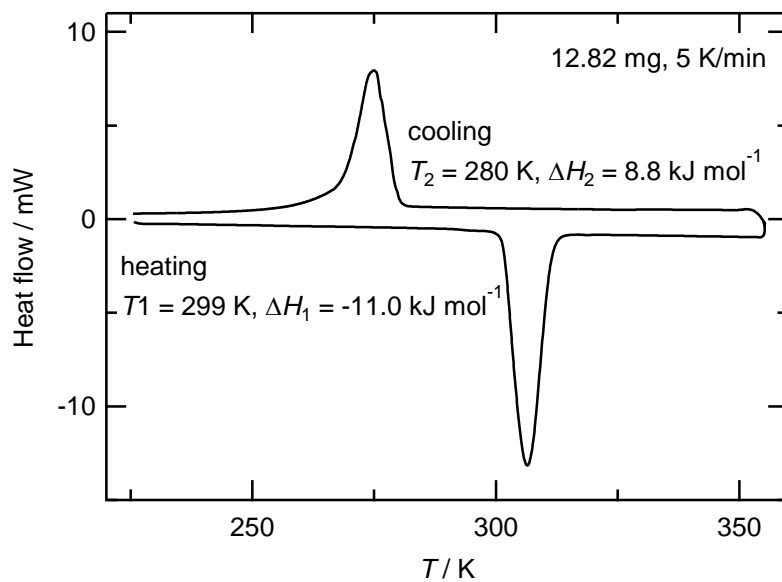

**Figure S5.** A difference scanning thermoanalysis of **1**. The data were conducted using a Rigaku Thermo plus TG8120 differential scanning calorimeter.

## References

- [1] S.-S. Chang, E. F. Westrum JR. *J. Phys. Chem.* **1960**, *64*, 1547-1551.
- [2] S. Matsumoto, T. Higashiyama, H. Akutsu, S. Nakatsuji, *Angew. Chem. Int. Ed.* **2011**, *50*, 10879-10883.
- [3] T. Clark, T. Mc. O. Knox, H. Mackle, M. A. McKervey, *J. Chem. Soc., Faraday Trans. 1* **1977**, *73*, 1224-1231.
- [4] I. S. Butler, H. B. R. Cole, D. F. R. Gilson, P. D. Harver, J. D. McFarlane, *J. Chem. Soc., Faraday Trans. 2* **1986**, *82*, 535.
- [5] This work (fig. S1).
- [6] M. B. Charapennikau, A. V. Blokhim, A. G. Kabo, G. J. Kabo, *J. Chem. Thermodyn.* **2003**, *35*, 145-157.
- [7] J. P. Amoureux, M. Bee, C. Gors, V. Warin, F. Baert, *Cryst. Struct. Commun.* **1979**, *8*, 449.
- [8] J. A. Kanters, R. W. W. Hooft, A. J. M. Duisenberg, *J. Crystallogr. Spectrosc. Res.* **1990**, *20*, 123-131.
